# Supplementary material
Source: PubMed Central journal article supplement (PMC2575318)
Supplement: 0803762105_0803762105SI.pdf [file 0803762105_0803762105SI.pdf]

# Supporting Information

Buchanan *et al.* 10.1073/pnas.0803762105

Table S1. The uncalibrated and calibrated radiocarbon data used in the analyses

| Site name       | Uncalibrated radiocarbon age | Error    | Calibrated radiocarbon age | Error | Ref. |
|-----------------|------------------------------|----------|----------------------------|-------|------|
| 12 Mile Creek   | 10503.72                     | 66.25784 | 12480                      | 150   | 1    |
| 13TM173         | 9550                         | 100      | 10900                      | 170   | 1    |
| 32DU181         | 8870                         | 70       | 9970                       | 150   | 1    |
| 32DU183         | 9840                         | 60       | 11270                      | 60    | 1    |
| 32DU224         | 9690                         | 60       | 11040                      | 150   | 1    |
| 35CU67C         | 8429.044                     | 48.23684 | 9460                       | 50    | 1    |
| 35HA1028        | 8440                         | 90       | 9420                       | 90    | 1    |
| 35HA2222        | 9360.946                     | 122.06   | 10600                      | 190   | 1    |
| 35JE49          | 8202.353                     | 45.5554  | 9160                       | 80    | 1    |
| 35JE49          | 9360.9                       | 34.45837 | 10590                      | 60    | 1    |
| 35LA861         | 9485                         | 90       | 10830                      | 190   | 1    |
| 35LK1180        | 8220                         | 430      | 9180                       | 520   | 1    |
| 35LK1180        | 9880                         | 360      | 11440                      | 590   | 1    |
| 35LK1871        | 11490                        | 90       | 13360                      | 90    | 1    |
| 35LK1881        | 8750.129                     | 55.1487  | 9760                       | 120   | 1    |
| 35LK2076        | 8803.824                     | 102.8992 | 9890                       | 200   | 1    |
| 35LK2076        | 10020                        | 370      | 11660                      | 600   | 1    |
| 41LU26          | 11100                        | 80       | 13020                      | 80    | 1    |
| 41WH19          | 9920                         | 530      | 11500                      | 790   | 1    |
| 42SA17107       | 8340                         | 290      | 9280                       | 370   | 1    |
| 42SA17215       | 8330                         | 110      | 9300                       | 140   | 1    |
| 42SA17216       | 8100                         | 220      | 9000                       | 290   | 1    |
| 45CH58          | 8180                         | 90       | 9160                       | 120   | 1    |
| 45GA47          | 8050                         | 110      | 8930                       | 180   | 1    |
| 45KI25          | 8540                         | 110      | 9560                       | 110   | 1    |
| 45WT111         | 8590                         | 160      | 9670                       | 210   | 1    |
| 48FR3160        | 8210                         | 60       | 9180                       | 100   | 1    |
| 48LN1101        | 8500                         | 120      | 9480                       | 130   | 1    |
| 48LN1185        | 8180                         | 270      | 9080                       | 340   | 1    |
| 48LN1185        | 8570                         | 220      | 9630                       | 300   | 1    |
| 48LN1658        | 9530                         | 300      | 10860                      | 410   | 1    |
| 48LN1679        | 9650                         | 290      | 11060                      | 450   | 1    |
| 48LN2996        | 8170                         | 70       | 9150                       | 100   | 1    |
| 48LN373         | 8980                         | 130      | 10050                      | 190   | 1    |
| 48PA328         | 8270                         | 90       | 9260                       | 130   | 1    |
| 48SU2980        | 8510                         | 160      | 9520                       | 200   | 1    |
| 48SW4492        | 8020                         | 90       | 8870                       | 140   | 1    |
| 48UT786         | 8475.276                     | 59.4829  | 9490                       | 40    | 1    |
| 8LE2105         | 9870.492                     | 38.41106 | 11280                      | 40    | 1    |
| Agate Basin     | 9750                         | 130      | 11090                      | 220   | 1    |
| Agate Basin     | 9990                         | 225      | 11610                      | 360   | 1    |
| Agate Basin     | 10375                        | 700      | 11930                      | 890   | 1    |
| Agate Basin     | 10412.72                     | 548.172  | 12040                      | 720   | 1    |
| Agate Basin     | 10445                        | 110      | 12380                      | 220   | 1    |
| Agate Basin     | 10575                        | 90       | 12570                      | 160   | 1    |
| Agate Basin     | 10780                        | 120      | 12770                      | 100   | 1    |
| Agate Basin     | 11144.62                     | 59.73748 | 13050                      | 70    | 1    |
| Agate Basin     | 11700                        | 95       | 13560                      | 120   | 1    |
| Albertson       | 8410                         | 245      | 9390                       | 310   | 1    |
| Alexon          | 9990                         | 200      | 11610                      | 330   | 1    |
| Alexon          | 11170                        | 130      | 13080                      | 110   | 1    |
| Alkali Creek    | 8528.071                     | 29.29379 | 9520                       | 20    | 1    |
| Allen           | 8050                         | 80       | 8920                       | 140   | 1    |
| Allen           | 8160                         | 80       | 9140                       | 110   | 1    |
| Angeles Mesa    | 10500                        | 2000     | 12260                      | 2540  | 1    |
| Anzick          | 11040                        | 35       | 12980                      | 60    | 2    |
| Arenosa Shelter | 9550                         | 190      | 10860                      | 260   | 1    |





| Site name                  | Uncalibrated radiocarbon age | Error    | Calibrated radiocarbon age | Error | Ref. |
|----------------------------|------------------------------|----------|----------------------------|-------|------|
| Dill Farm                  | 8050                         | 90       | 8920                       | 150   | 1    |
| Dirty Shame Rockshelter    | 8994.608                     | 41.62469 | 10130                      | 90    | 1    |
| DjPm-79                    | 8560                         | 160      | 9620                       | 210   | 1    |
| DjPo-81                    | 8594.382                     | 169.5997 | 9670                       | 220   | 1    |
| Domebo                     | 10960                        | 30       | 12910                      | 30    | 2    |
| Double Adobe               | 9350                         | 160      | 10630                      | 260   | 1    |
| Double P                   | 8555                         | 200      | 9610                       | 270   | 1    |
| Dust Cave                  | 8470                         | 50       | 9490                       | 30    | 1    |
| Dust Cave                  | 8790.191                     | 47.96828 | 9830                       | 110   | 1    |
| Dust Cave                  | 9921.765                     | 45.5554  | 11360                      | 90    | 1    |
| Dust Cave                  | 10167.95                     | 16.13508 | 11870                      | 80    | 1    |
| Dust Devil Cave (NA7613)   | 8762.095                     | 90.64461 | 9830                       | 190   | 1    |
| Dutchess Quarry Cave No. 8 | 8290                         | 100      | 9270                       | 140   | 1    |
| Dyer Elk                   | 9200                         | 280      | 10400                      | 410   | 1    |
| Eagle Cave                 | 8677.637                     | 62.17997 | 9660                       | 90    | 1    |
| Eagle Shelter              | 9775                         | 90       | 11120                      | 160   | 1    |
| East Wenatchee             | 11125                        | 130      | 13050                      | 110   | 2    |
| Echo Bay (1128T)           | 9270                         | 100      | 10460                      | 140   | 1    |
| Echo Bay (1128T)           | 9640                         | 70       | 10990                      | 150   | 1    |
| Edgar                      | 8860                         | 170      | 9930                       | 230   | 1    |
| EgPs-48                    | 8250                         | 130      | 9230                       | 160   | 1    |
| EiBl-5                     | 8010                         | 110      | 8870                       | 160   | 1    |
| ElTa-18                    | 9940                         | 50       | 11420                      | 130   | 1    |
| Enoch Fork Rockshelter     | 8740                         | 130      | 9830                       | 210   | 1    |
| Enoch Fork Rockshelter     | 10960                        | 240      | 12900                      | 220   | 1    |
| Eppley Rockshelter         | 10743.16                     | 79.2624  | 12770                      | 70    | 1    |
| Esker                      | 10060                        | 60       | 11600                      | 160   | 1    |
| False Cougar Cave          | 8255                         | 120      | 9240                       | 160   | 1    |
| False Cougar Cave          | 10530                        | 140      | 12460                      | 240   | 1    |
| FcQa-8                     | 8030                         | 200      | 8940                       | 270   | 1    |
| Ferry                      | 8160                         | 200      | 9070                       | 280   | 1    |
| Filemile Rapids/Roadcut    | 9785                         | 220      | 11240                      | 390   | 1    |
| Finley                     | 9165.545                     | 54.54851 | 10350                      | 80    | 1    |
| Fishbone Cave              | 11200                        | 250      | 13130                      | 200   | 1    |
| Fishing Bridge             | 8940                         | 60       | 10060                      | 110   | 1    |
| Flaming Arrow              | 9937.348                     | 66.89647 | 11430                      | 140   | 1    |
| Flooded Cave               | 10000                        | 200      | 11620                      | 330   | 1    |
| Folsom                     | 10890.61                     | 48.61214 | 12880                      | 30    | 1    |
| Fort Langley               | 8368.118                     | 45.5554  | 9390                       | 60    | 1    |
| Fort Rock Cave             | 8765.07                      | 69.21389 | 9800                       | 140   | 1    |
| Fort Rock Cave             | 9043.587                     | 118.2531 | 10160                      | 190   | 1    |
| Fossil Lake                | 10176.56                     | 82.32913 | 11830                      | 180   | 1    |
| Gap                        | 8449.438                     | 127.1997 | 9410                       | 130   | 1    |
| Gardepe                    | 9380                         | 100      | 10620                      | 150   | 1    |
| Glenrose Cannery           | 8150                         | 250      | 9050                       | 320   | 1    |
| Gore Creek                 | 8340                         | 115      | 9310                       | 140   | 1    |
| Graham Cave                | 8830                         | 250      | 9920                       | 290   | 1    |
| Graham Cave                | 9520.358                     | 173.133  | 10840                      | 250   | 1    |
| Grey-Taylor                | 8600                         | 245      | 9680                       | 330   | 1    |
| Grimes Burial Shelter      | 9470                         | 60       | 10810                      | 180   | 1    |
| Guest mammoth              | 9840                         | 190      | 11320                      | 360   | 1    |
| Handprint Cave             | 10740                        | 70       | 12780                      | 60    | 1    |
| Hanson                     | 9285                         | 90       | 10470                      | 130   | 1    |
| Hanson                     | 10231.65                     | 88.21438 | 11960                      | 190   | 1    |
| Harney Lake                | 8680                         | 55       | 9660                       | 80    | 1    |
| Hastqin                    | 8260                         | 100      | 9250                       | 140   | 1    |
| Hatwai                     | 9554.661                     | 76.72611 | 10910                      | 150   | 1    |
| Hatwai                     | 10355.65                     | 117.6748 | 12250                      | 250   | 1    |
| Hawkwood                   | 8330                         | 330      | 9280                       | 430   | 1    |
| Headquarters               | 8300                         | 140      | 9260                       | 170   | 1    |
| Hebior                     | 12531.43                     | 26.0133  | 14680                      | 180   | 1    |
| Hedden                     | 10550                        | 43       | 12560                      | 120   | 3    |
| Heisler mastodon           | 11465                        | 77.78175 | 13330                      | 70    | 1    |
| Hell Gap                   | 8590                         | 350      | 9640                       | 460   | 1    |
| Hell Gap                   | 8600                         | 600      | 9680                       | 770   | 1    |







| Site name                 | Uncalibrated radiocarbon age | Error    | Calibrated radiocarbon age | Error | Ref. |
|---------------------------|------------------------------|----------|----------------------------|-------|------|
| Paleo Crossing            | 10980                        | 75       | 12950                      | 70    | 2    |
| Patrick                   | 9410                         | 290      | 10710                      | 390   | 1    |
| Paulina Lake              | 8503.828                     | 34.23433 | 9510                       | 30    | 1    |
| Paulina Lake              | 9068.898                     | 72.84    | 10260                      | 80    | 1    |
| Pee Wee Grande            | 8230                         | 90       | 9220                       | 130   | 1    |
| Pendejo Cave              | 11509.83                     | 88.70455 | 13380                      | 90    | 1    |
| Pendejo Cave              | 12355.39                     | 50.31968 | 14360                      | 180   | 1    |
| Pictograph Cave           | 8580                         | 80       | 9590                       | 80    | 1    |
| Pigeon Cliffs             | 8280                         | 1000     | 9470                       | 1210  | 1    |
| Pigeon Roost Creek        | 8500                         | 220      | 9520                       | 300   | 1    |
| Pine Bluffs               | 9880                         | 130      | 11420                      | 210   | 1    |
| Pine Spring               | 9775                         | 195      | 11210                      | 350   | 1    |
| Pinware Hill              | 8850                         | 100      | 9930                       | 180   | 1    |
| Plainview                 | 10070                        | 500      | 11680                      | 750   | 1    |
| Pleasant Lake             | 10395                        | 100      | 12320                      | 220   | 1    |
| Poland                    | 10240                        | 90       | 11980                      | 200   | 1    |
| Poole Inlet West (1359T)  | 8270                         | 60       | 9270                       | 110   | 1    |
| Porter Hollow             | 10090                        | 120      | 11680                      | 250   | 1    |
| Puckett                   | 8655                         | 127.2792 | 9730                       | 170   | 1    |
| Puckett                   | 9790                         | 160      | 11210                      | 310   | 1    |
| Pyramid Lake              | 9660                         | 170      | 10990                      | 230   | 1    |
| Raddatz Rockshelter       | 11610                        | 300      | 13510                      | 280   | 1    |
| Radiant 3                 | 8690                         | 690      | 9840                       | 890   | 1    |
| Rancho La Brea            | 9000                         | 80       | 10100                      | 130   | 1    |
| Rancho Park North         | 8040                         | 80       | 8900                       | 130   | 1    |
| Rancho Park North         | 8103.774                     | 37.38054 | 9050                       | 40    | 1    |
| Rappuhn mastodon          | 10674.21                     | 91.76629 | 12660                      | 140   | 1    |
| Rattlesnake Pass          | 9860                         | 106.066  | 11380                      | 170   | 1    |
| Rawhide Butte             | 10550                        | 350      | 12270                      | 490   | 1    |
| Rawhide Creek             | 10180                        | 480      | 11830                      | 690   | 1    |
| Ray Long                  | 9380                         | 250      | 10680                      | 350   | 1    |
| Redfish Lake Overhang     | 8060                         | 190      | 8970                       | 270   | 1    |
| Redfish Lake Overhang     | 10180                        | 127.2792 | 11830                      | 280   | 1    |
| Rex Rodgers               | 9118                         | 83       | 10320                      | 100   | 1    |
| Richard Beene             | 9825                         | 84.85281 | 11280                      | 100   | 1    |
| Richardson Island (1127T) | 8659.76                      | 22.82609 | 9600                       | 40    | 1    |
| Richardson Island (1127T) | 8874.017                     | 25.22614 | 10030                      | 90    | 1    |
| Richardson Island (1127T) | 9140.225                     | 20.13468 | 10290                      | 40    | 1    |
| Richmond Hill             | 9360                         | 120      | 10600                      | 190   | 1    |
| Rimouski                  | 8150                         | 130      | 9080                       | 210   | 1    |
| Rock Bar Alcove           | 8280                         | 160      | 9240                       | 190   | 1    |
| Rock Creek Alcove         | 8660                         | 80       | 9680                       | 110   | 1    |
| Rodgers Shelter           | 8065                         | 212.132  | 8970                       | 290   | 1    |
| Rodgers Shelter           | 8100                         | 140      | 9010                       | 230   | 1    |
| Rodgers Shelter           | 10267.63                     | 294.25   | 12000                      | 500   | 1    |
| Rogers Ridge              | 8314.941                     | 70.57228 | 9310                       | 110   | 1    |
| Rose Island               | 9133.568                     | 117.0172 | 10340                      | 130   | 1    |
| Rumford Falls I           | 8850                         | 140      | 9920                       | 210   | 1    |
| Rumford Falls V           | 9370                         | 120      | 10620                      | 200   | 1    |
| Running Springs           | 9380                         | 140      | 10670                      | 250   | 1    |
| Rush Bay Road             | 8450                         | 550      | 9480                       | 690   | 1    |
| Russ                      | 8220                         | 420      | 9170                       | 510   | 1    |
| Russell Cave              | 8397.139                     | 84.22967 | 9390                       | 90    | 1    |
| Russell Cave              | 9020                         | 175      | 10120                      | 260   | 1    |
| Ryan's                    | 9220                         | 220      | 10440                      | 300   | 1    |
| San Jon                   | 8360                         | 210      | 9300                       | 240   | 1    |
| Sandal Shelter            | 8300                         | 60       | 9300                       | 110   | 1    |
| Saskatoon Mountain        | 8130                         | 130      | 9050                       | 210   | 1    |
| Saskatoon Mountain        | 8170                         | 210      | 9080                       | 290   | 1    |
| Saskatoon Mountain        | 8620                         | 620      | 9710                       | 790   | 1    |
| Saskatoon Mountain        | 9360.541                     | 59.18364 | 10580                      | 80    | 1    |
| Saugus Quarry             | 8095                         | 415      | 9020                       | 470   | 1    |
| Scaredy Cat Cave          | 8190                         | 100      | 9180                       | 130   | 1    |
| Schaefer Mammoth          | 12368.8                      | 21.2932  | 14360                      | 150   | 1    |
| Schiffer Cave             | 8430                         | 113.1371 | 9400                       | 120   | 1    |



| Site name                | Uncalibrated radiocarbon age | Error    | Calibrated radiocarbon age | Error | Ref. |
|--------------------------|------------------------------|----------|----------------------------|-------|------|
| Schmidt                  | 8100                         | 500      | 9060                       | 580   | 1    |
| Seal Cave                | 9030                         | 100      | 10140                      | 160   | 1    |
| Seal Cave                | 9440                         | 50       | 10680                      | 70    | 1    |
| Second Lake (162R)       | 9455                         | 450      | 10840                      | 650   | 1    |
| Sedgewick Bay (791T)     | 8080                         | 60       | 8970                       | 120   | 1    |
| Seed Cave                | 8370                         | 230      | 9320                       | 270   | 1    |
| Sentinel Gap             | 8880                         | 70       | 9980                       | 150   | 1    |
| Sentinel Gap             | 10144.46                     | 25.94093 | 11830                      | 100   | 1    |
| Sevier Desert            | 9570                         | 430      | 11010                      | 650   | 1    |
| Sharrow                  | 8524.136                     | 53.47735 | 9510                       | 30    | 1    |
| Shawnee-Minisink         | 10935                        | 15       | 12890                      | 30    | 2    |
| Sheaman                  | 10618.49                     | 98.31456 | 12600                      | 160   | 1    |
| Sheep Rock Shelter       | 8870                         | 320      | 9990                       | 390   | 1    |
| Sheep Rock Spring        | 9315.256                     | 25.55071 | 10530                      | 40    | 1    |
| Sheguiandah              | 9275.049                     | 45.41937 | 10450                      | 90    | 1    |
| Shelton mastodon         | 9618.703                     | 111.1554 | 10960                      | 170   | 1    |
| Sheriden Cave            | 10765.87                     | 22.72554 | 12820                      | 30    | 1    |
| Sheriden Cave            | 10788.8                      | 48       | 12830                      | 30    | 1    |
| Sheriden Cave            | 10847.12                     | 44.60906 | 12860                      | 30    | 1    |
| Sheriden Cave            | 11536.86                     | 40.64516 | 13380                      | 50    | 1    |
| Shinners Site A          | 8380                         | 120      | 9340                       | 140   | 1    |
| Shinners Site A          | 9540                         | 120      | 10880                      | 190   | 1    |
| Sibbald Creek            | 9570                         | 320      | 10950                      | 460   | 1    |
| Silver Mound Rockshelter | 9405                         | 90       | 10670                      | 150   | 1    |
| Simonsen                 | 8430                         | 520      | 9450                       | 660   | 1    |
| Sinnock                  | 8030                         | 160      | 8920                       | 230   | 1    |
| Sister's Hill            | 9622.92                      | 169.2641 | 10950                      | 230   | 1    |
| Site 243R                | 8754                         | 35.77709 | 9760                       | 90    | 1    |
| Skyrocket                | 8550                         | 150      | 9590                       | 190   | 1    |
| Skyrocket                | 9050                         | 90       | 10180                      | 150   | 1    |
| Skyrocket                | 9410                         | 250      | 10710                      | 350   | 1    |
| Sloth Hole               | 11050                        | 50       | 12990                      | 60    | 2    |
| Smith Creek Cave         | 10859.64                     | 44.13122 | 12860                      | 30    | 1    |
| Smith Mountain           | 8810                         | 130      | 9890                       | 210   | 1    |
| Smith Mountain           | 10150                        | 70       | 11790                      | 170   | 1    |
| Sommers                  | 8700                         | 65       | 9700                       | 110   | 1    |
| Southsider Cave          | 8890.99                      | 155.082  | 9950                       | 220   | 1    |
| Spirit Cave              | 9333.994                     | 19.32061 | 10550                      | 30    | 1    |
| Squaw Rockshelter        | 9480                         | 160      | 10800                      | 250   | 1    |
| St. Albans               | 8250                         | 100      | 9240                       | 140   | 1    |
| St. Albans               | 8253.851                     | 88.7214  | 9240                       | 130   | 1    |
| St. Albans               | 8943.024                     | 114.7836 | 10010                      | 180   | 1    |
| St. Louis                | 8400                         | 70       | 9400                       | 80    | 1    |
| St. Louis                | 9150                         | 40       | 10320                      | 60    | 1    |
| Stamp                    | 9130                         | 200      | 10280                      | 290   | 1    |
| Stamp                    | 9660                         | 140      | 10980                      | 200   | 1    |
| Standish                 | 8170                         | 90       | 9150                       | 120   | 1    |
| Stanfield-Worley Shelter | 9260.052                     | 182.7623 | 10510                      | 230   | 1    |
| State Road Ripple        | 11385                        | 140      | 13260                      | 130   | 1    |
| Steel                    | 9510                         | 60       | 10870                      | 160   | 1    |
| Steel's Pass             | 9250                         | 70       | 10420                      | 110   | 1    |
| Steel's Pass             | 10100                        | 80       | 11690                      | 210   | 1    |
| Stick Man                | 8090                         | 28.86751 | 9030                       | 30    | 1    |
| Stigenwalt               | 8274.736                     | 115.3382 | 9250                       | 150   | 1    |
| Stonepine                | 9540                         | 70       | 10900                      | 150   | 1    |
| Stucke Farm              | 9370                         | 70       | 10590                      | 90    | 1    |
| Sunshine Locality        | 9873.115                     | 38.41106 | 11280                      | 40    | 1    |
| Sunshine Locality        | 10502.91                     | 26.82611 | 12520                      | 100   | 1    |
| Survey Point             | 12260                        | 141.4214 | 14290                      | 270   | 1    |
| Swan Landing             | 8675                         | 270      | 9770                       | 330   | 1    |
| Swan's Landing           | 8015                         | 180      | 8910                       | 250   | 1    |
| Table Land               | 8498.941                     | 32.21253 | 9510                       | 20    | 1    |
| Taylor                   | 9814.195                     | 35.14949 | 11230                      | 30    | 1    |
| Templeton                | 10190                        | 300      | 11910                      | 500   | 1    |
| Thunderbird              | 9900                         | 340      | 11470                      | 570   | 1    |

| Site name                     | Uncalibrated radiocarbon age | Error    | Calibrated radiocarbon age | Error | Ref. |
|-------------------------------|------------------------------|----------|----------------------------|-------|------|
| Titus                         | 8070                         | 100      | 8960                       | 170   | 1    |
| Tule Lake Shelter             | 11450                        | 340      | 13380                      | 310   | 1    |
| Turkey Swamp                  | 8739                         | 165      | 9840                       | 230   | 1    |
| Two Moon Rockshelter          | 8570                         | 60       | 9560                       | 50    | 1    |
| Two Moon Rockshelter          | 10060                        | 60       | 11600                      | 160   | 1    |
| Union Pacific mammoth         | 11360                        | 350      | 13300                      | 320   | 1    |
| Upper Shawnee Island          | 9330                         | 545      | 10680                      | 780   | 1    |
| Vail                          | 10530                        | 103      | 12490                      | 200   | 3    |
| Varney Farm                   | 8568.682                     | 30.69978 | 9540                       | 20    | 1    |
| Vegan                         | 8400                         | 130      | 9350                       | 150   | 1    |
| Ventana Cave                  | 9310.61                      | 30.03141 | 10510                      | 50    | 1    |
| Ventana Cave                  | 10390.87                     | 80.93116 | 12320                      | 190   | 1    |
| Ventana Cave                  | 11300                        | 1200     | 13170                      | 1620  | 1    |
| Vermilion Lakes Loc. A (153R) | 9644.239                     | 98.23958 | 10980                      | 170   | 1    |
| Vermilion Lakes Loc. A (153R) | 9921.711                     | 46.151   | 11370                      | 90    | 1    |
| Vermilion Lakes Loc. A (153R) | 10221.45                     | 107.2899 | 11930                      | 240   | 1    |
| Vermilion Lakes Loc. A (153R) | 10330.91                     | 60.46298 | 12190                      | 140   | 1    |
| Vermilion Lakes Loc. A (153R) | 10771.45                     | 173.4714 | 12680                      | 210   | 1    |
| Vermilion Lakes Loc. B (502R) | 9908.183                     | 96.72582 | 11430                      | 170   | 1    |
| Wadleigh Falls                | 8630                         | 150      | 9720                       | 200   | 1    |
| Wallmann mammoth              | 11080                        | 300      | 13010                      | 260   | 1    |
| Walnut Street trench          | 8685                         | 370      | 9750                       | 460   | 1    |
| Walter's Cave                 | 8875                         | 125      | 9940                       | 200   | 1    |
| Wapanucket 8                  | 8638.183                     | 58.256   | 9620                       | 60    | 1    |
| Ward's Point                  | 8250                         | 140      | 9220                       | 170   | 1    |
| Warm Mineral Spring           | 9337.465                     | 195.9105 | 10640                      | 300   | 1    |
| Warm Mineral Spring           | 10980                        | 160      | 12970                      | 120   | 1    |
| Wasden, Owl Cave              | 10328.02                     | 49.51575 | 12190                      | 130   | 1    |
| Weirs Beach                   | 9022.462                     | 185.4239 | 10120                      | 280   | 1    |
| Weirs Beach                   | 9615                         | 225      | 10940                      | 300   | 1    |
| Welsch                        | 8000                         | 120      | 8860                       | 170   | 1    |
| Welsch                        | 8090                         | 110      | 9000                       | 200   | 1    |
| Welsch                        | 8173.698                     | 81.08696 | 9150                       | 110   | 1    |
| Welsch                        | 8190                         | 77.78175 | 9170                       | 110   | 1    |
| Welsch                        | 8224.523                     | 65.2698  | 9200                       | 110   | 1    |
| Welsch                        | 8240                         | 77.78175 | 9230                       | 120   | 1    |
| West Creek                    | 9850                         | 160      | 11350                      | 280   | 1    |
| Wewukiyephuh                  | 10343.17                     | 31.23475 | 12210                      | 110   | 1    |
| Whalen                        | 9302.094                     | 97.71764 | 10490                      | 140   | 1    |
| WHD Sage Creek                | 8230                         | 540      | 9230                       | 650   | 1    |
| WHD Sage Creek                | 8527.09                      | 179.2876 | 9560                       | 240   | 1    |
| Whipple                       | 10376.7                      | 176.8103 | 12220                      | 340   | 1    |
| Willard mastodon              | 9600                         | 205      | 10920                      | 270   | 1    |
| Wilson Butte Cave             | 10440.33                     | 66.89647 | 12380                      | 180   | 1    |
| Wilson-Leonard                | 8884.416                     | 68.37635 | 9990                       | 140   | 1    |
| Wilson-Leonard                | 9555.039                     | 66.11497 | 10910                      | 150   | 1    |
| Windy Mesa                    | 8270                         | 80       | 9260                       | 130   | 1    |
| Winger                        | 9080                         | 90       | 10270                      | 110   | 1    |
| Wizard Beach                  | 9204.145                     | 29.4534  | 10360                      | 70    | 1    |
| Wood Island                   | 8040                         | 90       | 8910                       | 150   | 1    |
| Wyght                         | 8030                         | 1970     | 9340                       | 2370  | 1    |

1. Morlan RE (2005) CARD, Canadian Archaeological Radiocarbon Database (Canadian Museum of Civilization, Gatineau).
2. Waters MR, Stafford TW, Jr (2007) Redefining the age of Clovis: Implications for the peopling of the Americas. *Science* 315:1122–1126.
3. Hamilton MJ, Buchanan B (2007) Spatial gradients in Clovis-age radiocarbon dates across North America suggest rapid colonization from the north. *Proc Natl Acad Sci USA* 104:15625–15630.
